# Supplementary material
Source: PubMed Central journal article supplement (PMC4336826)

**Figure S1: The effects of EMT-relevant transcription factors on NOVA1 protein expression.** Western blotting of NOVA1 in PC-3E cells transduced by SNAI1-ER, ZEB1, or TWIST2. SNAI1-ER-inducible PC-3E cell line was treated with 4-Hydroxytamoxifen (4-OHT) for the indicated period of time.  $\beta$ -actin was used as loading control. EV, empty vector.

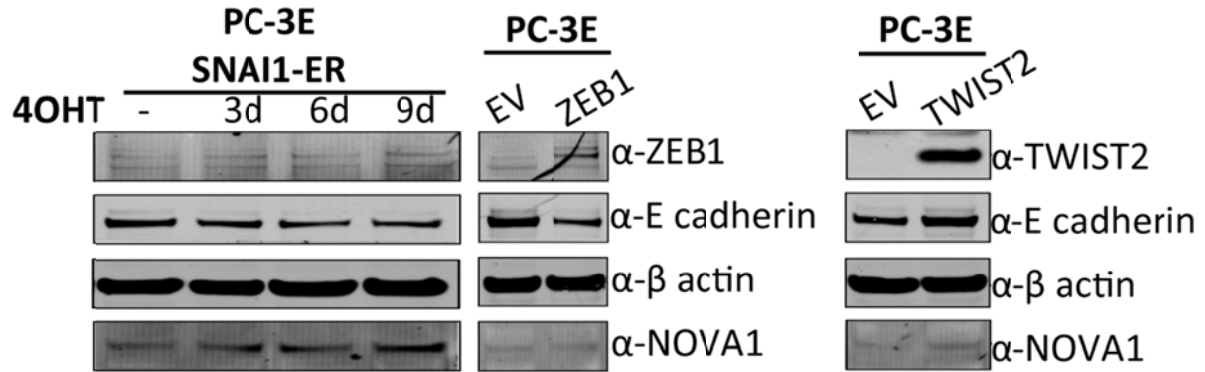

Supplement: NIHMS633389-supplement-1.pdf [file NIHMS633389-supplement-1.pdf]
