# Supplementary material
Source: PubMed Central journal article supplement (PMC4336826)
Supplement: NIHMS633389-supplement-2.pdf [file NIHMS633389-supplement-2.pdf]

**Table S1: Primers****Primers for EMT splicing signatures**

| Gene Symbol     | Exon coordinate (hg19)        | Left primer               | Right primer           | Skipping size (bp) | Inclusion size (bp) |
|-----------------|-------------------------------|---------------------------|------------------------|--------------------|---------------------|
| <i>ENAH</i>     | chr1:225,692,695-225,692,755  | TGCTTCAGCCTGTCATAGTCA     | TGGCAGCAAGTCACTGTGA    | 105                | 168                 |
| <i>FLNB</i>     | chr3:58,127,585-58,127,656    | GGCGAAGAAGTAGGCTTTGTGG    | GCCGTTTCATGTCACTCACTGG | 261                | 333 & 300           |
| <i>FNIP1</i>    | chr5:131,046,271-131,046,354  | TCAGGACAACAATACATTAAGGCTG | CAGACCGTGTATGCCACTG    | 137                | 221                 |
| <i>ARFGAP2</i>  | chr11:47,194,261-47,194,302   | CCCCAACACAGACCTGCTT       | CTTAGCTGCTGCTGGCTTCT   | 91                 | 133                 |
| <i>SLC37A2</i>  | chr11:124,956,100-124,956,156 | GATCTTGGCCTGGAAAGTGT      | TTCCCTGCTTGTGGAAGTTT   | 148                | 205                 |
| <i>SLK</i>      | chr10:105,770,574-105,770,666 | AGACTATCGAACGCCTGGAA      | AACTCTGCCTTCTGCTGCTG   | 205                | 298                 |
| <i>ARHGEF11</i> | chr1:156,908,210-156,908,305  | CAGAGCAGGAAGACATGGGT      | TGAGCCTGTTGAGCTGAGA    | 399                | 495                 |
| <i>MAGI1</i>    | chr3:65,433,697-65,433,732    | TAGACCCTCGGTGCCTAAAC      | AATCTTTTCCCAACCAGCAG   | 119                | 83                  |
| <i>SCRIB</i>    | chr8:144,889,722-144,889,784  | AGCACTGAGGAGGAGACAA       | TATAGGGTGTGGAGCCCTTG   | 130                | 193                 |

**Primers for splicing factor realtime PCR**

| Gene Symbol   | Left primer           | Right primer          | PCR amplicon size (bp) |
|---------------|-----------------------|-----------------------|------------------------|
| <i>GAPDH</i>  | TGGTATCGTGGAAAGGACTCA | ACAGTCTCTGGGTGGCAGT   | 60                     |
| <i>ESRP1</i>  | ACAGAATGCGTTGAGGAAGC  | AGAGGGGCCGAGGAGAAT    | 114                    |
| <i>ESRP2</i>  | AGGAGATGAGCCGAGTGTCT  | GCTTGGAAAGGTGGTGTAGGT | 109                    |
| <i>NOVA1</i>  | CCGGCAGCACCAAGAG      | GTCTGTCTCCCTTCCAAT    | 106                    |
| <i>RBFOX2</i> | TAGAGGGCCGTAAAATCGAG  | CTGGGCTTAATTTCCAACCA  | 99                     |
| <i>MBNL3</i>  | CCTGAAACCCACCTCTTG    | CTCCCCACGGGTACAATTT   | 111                    |
| <i>RBM39</i>  | GGGAACAACCTGGTCTCTTC  | ATGCCAAAGGCCACTCATC   | 107                    |

**Primers for differentially spliced exons**

| Gene Symbol     | Exon coordinate (hg19)    | Left primer          | Right primer          | Skipping size (bp) | Inclusion size (bp) |
|-----------------|---------------------------|----------------------|-----------------------|--------------------|---------------------|
| <i>ACLY</i>     | chr17:40052872-40052902   | CCAGCAGGACAGCATCTTTT | TCGGGAGCAGACATAGTCAA  | 185                | 215                 |
| <i>AKAP9</i>    | chr7:91671359-91671500    | CCAAGAACATCAACAGGCAA | CAGGAGGCACATCTCAGGT   | 209                | 350                 |
| <i>FLNA</i>     | chrX:153585618-153585642  | CAAGCCGAAGAAGACACACA | ATTCTCCACCACGTCCACAT  | 319                | 343                 |
| <i>MAP4K4</i>   | chr2:102487955-102488147  | GCAATGGTGAACCGAATCT  | TCCGCTAGATGGAGAAATCTG | 203                | 395                 |
| <i>MYO6</i>     | chr6:76621388-76621415    | GGCAGCTTGACAGAGAAGAT | CACAAGTAGGATGGGTGGCT  | 334                | 361                 |
| <i>PLD1</i>     | chr3:171404474-171404588  | GCCTGTTCAAACCTACCCA  | GCAGTAGCTCTTCCATGCC   | 247                | 361                 |
| <i>SPAG9</i>    | chr17:49053223-49053262   | GGGACAGGAAATGGTGCAT  | GGGACTGCCACAAGAATTT   | 218                | 257                 |
| <i>TRERF1</i>   | chr6:42231057-42231306    | GTTTGGGGAGCAGTTTATG  | TGCCGAACTTTTCTTCTC    | 216                | 465                 |
| <i>TRIM37</i>   | chr17:57078958-57079075   | AGGTCATCTGGAAGGACTGC | GGGCCTATTTGTTCAACATC  | 144                | 261                 |
| <i>MADD</i>     | chr11:47310518-47310578   | ATCGGAACCACAGTACCAGC | TCTGATCCACTAACGCCCTC  | 120                | 180                 |
| <i>GRHL1</i>    | chr2:10102583-10102660    | TGGGCATTGATAAGAGAGGC | TGGGATAGAAGTGGCCTTTG  | 379                | 456                 |
| <i>IGF2BP3</i>  | chr7:23383336-23383472    | CACAGAAGAGATCCCTTGAA | TGAAGTGGGTGGGAACAGAC  | 186                | 322                 |
| <i>RPAP3</i>    | chr12:48073275-48073377   | GGAACCTGGAATAAGCAAGC | TATTCTCTGGAGCAGCAGCA  | 143                | 245                 |
| <i>STK36</i>    | chr2:21953113-21953216    | ACCACTGAGCCTGTGCTAT  | TGTTGCTCTCTGACTGTGC   | 274                | 377                 |
| <i>ARHGEF12</i> | chr11:120280102-120280159 | CACATGATTTTGACCCACA  | GGATTGTCTCACTGACCGT   | 94                 | 151                 |
| <i>CA12</i>     | chr15:63620296-63620329   | CCTTCCCCAGAGAAATGAT  | AAAAGCCAAATGGACACCAC  | 155                | 188                 |
| <i>ITGA6</i>    | chr2:173366499-173366629  | GGGAGTACCTGGTGGATCA  | GTTGGA AAAAGCAGTTTGGG | 296                | 426                 |
| <i>MAP3K7</i>   | chr6:91254270-91254351    | GGAGCAGTGTGGAGACTTG  | GGATGGATCTACGTCTTGGC  | 123                | 204                 |
| <i>MYOF</i>     | chr10:95152673-95152712   | TAAAATTGCTGCCTCTGGTG | CGTGTACTCTGGGGCTTC    | 118                | 157                 |
| <i>NFYA</i>     | chr6:41048549-41048636    | CAGGAATCTCACTGGAGGG  | TGATGGTTTGACCTTGTCCA  | 207                | 294                 |
| <i>OSBPL3</i>   | chr7:24902818-24902911    | CCTGGTAGAAATGAGCCAGC | CTGATGAGTTTCAGAGCCA   | 194                | 287                 |
| <i>PDGFA</i>    | chr7:540067-540136        | ACGTCAGGAAGAGCCAAAA  | TGGCAATAAAGCACCGTACA  | 207                | 276                 |
| <i>USO1</i>     | chr4:76716488-76716509    | GAAAATGCCACCCAGAAAGA | GGAACATTGGCTGAATTGTG  | 213                | 234                 |
| <i>UTRN</i>     | chr6:145148483-145148522  | TCTGGGGAAGATGTACGAGA | CAGTTGAGGAGATTGTGAGGG | 154                | 193                 |
| <i>SNX14</i>    | chr6:86248555-86248582    | AATCACCAACACGCAATTCA | TAGGCAACATAGCTCCCTCC  | 132                | 159                 |
| <i>NDEL1</i>    | chr17:8366637-8366672     | ACCAAGCATCACGAAAATCC | GCAATCATGTGAAACCAACG  | 440                | 475                 |
| <i>INSR</i>     | chr19:7150507-7150543     | AATGCTGCTCCTGCCAAAG  | CGACTCTTGTCCACCCT     | 263                | 299                 |
| <i>TBX3</i>     | chr12:115117717-115117777 | CGAAATGCCAAAGAGGATGT | GGGGAACAAGTATGTCGGAA  | 229                | 289                 |
| <i>NCOR2</i>    | chr12:124858958-124859009 | GTGGAGGATGAGGAGATGGA | TCTCGGTGTCTGAGCTGTTG  | 100                | 151                 |
| <i>TSC2</i>     | chr16:2127598-2127727     | CGGTCCAATGTCTCTTGTG  | TCCAGGTGGAGGTTTTTCAG  | 182/185            | 314                 |
