# Supplementary material
Source: PubMed Central journal article supplement (PMC4336826)
Supplement: NIHMS633389-supplement-4.pdf [file NIHMS633389-supplement-4.pdf]

**Table S3: RBP binding sites**

| RNA binding protein | Consensus binding site | Reference                           |
|---------------------|------------------------|-------------------------------------|
| A1CF                | [AT]TAATT[AG]          | Nature. 2013 Jul 11;499(7457):172-7 |
| ANKHD1              | AGACG[AT][AT]          | Nature. 2013 Jul 11;499(7457):172-7 |
| BRUNOL4             | [GT]GTGT[GT][GT]       | Nature. 2013 Jul 11;499(7457):172-7 |
| CPEB2               | C[ACT]TTTTT            | Nature. 2013 Jul 11;499(7457):172-7 |
| DAZAP1              | TAG[GT][AT][AT][AG]    | Nature. 2013 Jul 11;499(7457):172-7 |
| FMR1                | [GT]GACA[AG]G          | Nature. 2013 Jul 11;499(7457):172-7 |
| FUS                 | CGCGC                  | Nature. 2013 Jul 11;499(7457):172-7 |
| SRSF10              | AGAGA[ACG][AC]         | Nature. 2013 Jul 11;499(7457):172-7 |
| FXR2                | [AGT]GAC[AG][AG][AG]   | Nature. 2013 Jul 11;499(7457):172-7 |
| G3BP2               | AGGAT[AGT][AG]         | Nature. 2013 Jul 11;499(7457):172-7 |
| HNRNPA1             | [AGT]TAGGG[AT]         | Nature. 2013 Jul 11;499(7457):172-7 |
| HNRNPA1L2           | [AGT]TAGGG[AT]         | Nature. 2013 Jul 11;499(7457):172-7 |
| HNRNPA2B1           | [AGT]TAGGG[AT]         | Nature. 2013 Jul 11;499(7457):172-7 |
| HNRNPC              | [ACT]TTTTT[GT]         | Nature. 2013 Jul 11;499(7457):172-7 |
| HNRNPK              | CCA[AT][AC]CC          | Nature. 2013 Jul 11;499(7457):172-7 |
| HNRNPL              | A[AC]A[CT]A[AC]A       | Nature. 2013 Jul 11;499(7457):172-7 |
| HuR                 | TT[AGT]TTTT            | Nature. 2013 Jul 11;499(7457):172-7 |
| IGF2BP2             | [ACG][AC]A[ACT][AT]CA  | Nature. 2013 Jul 11;499(7457):172-7 |
| KHDRBS3             | ATAAA[ACG]             | Nature. 2013 Jul 11;499(7457):172-7 |
| LIN28A              | [ACT]GGAG[AT]A         | Nature. 2013 Jul 11;499(7457):172-7 |
| MATR3               | [AC]ATCTT[AG]          | Nature. 2013 Jul 11;499(7457):172-7 |
| MBNL1               | GCTTGC                 | Nature. 2013 Jul 11;499(7457):172-7 |
| MSI1                | TAGT[AT][AG]G          | Nature. 2013 Jul 11;499(7457):172-7 |
| PABPC4              | AAAAAA[AG]             | Nature. 2013 Jul 11;499(7457):172-7 |
| PCBP2               | CC[CT][CT]CC[ACT]      | Nature. 2013 Jul 11;499(7457):172-7 |
| PPRC1               | [GC][GC]GCGC[GC]       | Nature. 2013 Jul 11;499(7457):172-7 |
| QKI                 | ACTAAC[ACG]            | Nature. 2013 Jul 11;499(7457):172-7 |
| RBM28               | G[AT]GTAG[AGT]         | Nature. 2013 Jul 11;499(7457):172-7 |
| RBM3                | [AG]A[AGT]AC[GT]A      | Nature. 2013 Jul 11;499(7457):172-7 |
| RBM4                | GCGCG[GC][GC]          | Nature. 2013 Jul 11;499(7457):172-7 |
| RBM41               | [AT]TAC[AT]T[GT]       | Nature. 2013 Jul 11;499(7457):172-7 |
| RBM46               | [AG]AT[GC]A[AT][AGT]   | Nature. 2013 Jul 11;499(7457):172-7 |
| RBM5                | GA[AG]GG[AT][AG]       | Nature. 2013 Jul 11;499(7457):172-7 |
| RBM8A               | [AG][CT]GCGC[CGT]      | Nature. 2013 Jul 11;499(7457):172-7 |
| RBMS3               | [AC]TATA[GT][AC]       | Nature. 2013 Jul 11;499(7457):172-7 |
| SAMD4A              | GC[GT]GG[ACT][AC]      | Nature. 2013 Jul 11;499(7457):172-7 |
| SART3               | A[AG]AAAA[AC]          | Nature. 2013 Jul 11;499(7457):172-7 |
| SRSF9               | [GT]G[AG][AT]G[GC][AC] | Nature. 2013 Jul 11;499(7457):172-7 |
| SNRNP70             | [AG][AT]TCAAG          | Nature. 2013 Jul 11;499(7457):172-7 |
| SNRPA               | [AT]TGCAC[AG]          | Nature. 2013 Jul 11;499(7457):172-7 |
| SRSF2               | GGAG[AT][AGT]          | Nature. 2013 Jul 11;499(7457):172-7 |
| SRSF7               | ACGACG                 | Nature. 2013 Jul 11;499(7457):172-7 |
| SRSF9               | A[GT]GA[ACG][AC][AG]   | Nature. 2013 Jul 11;499(7457):172-7 |
| TUT1                | [AC][AG]ATACT          | Nature. 2013 Jul 11;499(7457):172-7 |
| TARDBP              | GAATG[AGT]             | Nature. 2013 Jul 11;499(7457):172-7 |

|          |                     |                                     |
|----------|---------------------|-------------------------------------|
| TIA1     | TTTTT[CGT][GT]      | Nature. 2013 Jul 11;499(7457):172-7 |
| U2AF2    | TTTTT[CT]C          | Nature. 2013 Jul 11;499(7457):172-7 |
| YBX1     | AACATC              | Nature. 2013 Jul 11;499(7457):172-7 |
| YBX2     | AACA[AT]C[AGT]      | Nature. 2013 Jul 11;499(7457):172-7 |
| ZC3H10   | [GC][GC]AGCG[AC]    | Nature. 2013 Jul 11;499(7457):172-7 |
| ZC3H14   | TTT[AGT]TTT         | Nature. 2013 Jul 11;499(7457):172-7 |
| ZCRB1    | G[AG][ACT]TTAA      | Nature. 2013 Jul 11;499(7457):172-7 |
| SRSF10   | A[AG]AG[AG][AG][AG] | Nature. 2013 Jul 11;499(7457):172-7 |
| SRSF10   | AGAGA[AG][AG]       | Nature. 2013 Jul 11;499(7457):172-7 |
| SRSF10   | AGAGA[ACG][ACG]     | Nature. 2013 Jul 11;499(7457):172-7 |
| HNRNPL   | ACAC[AG]A[ACG]      | Nature. 2013 Jul 11;499(7457):172-7 |
| SRSF1    | G[AG]AGGA           | Nature. 2013 Jul 11;499(7457):172-7 |
| SRSF1    | GGAGGA              | Nature. 2013 Jul 11;499(7457):172-7 |
| SRSF1    | GGA[GC]G[AG][ACG]   | Nature. 2013 Jul 11;499(7457):172-7 |
| SRSF1    | GGA[GC]G[AG][ACG]   | Nature. 2013 Jul 11;499(7457):172-7 |
| SRSF1    | AGGA[GC][AC]        | Nature. 2013 Jul 11;499(7457):172-7 |
| HuR      | TT[AT]GTTT          | Nature. 2013 Jul 11;499(7457):172-7 |
| RBM4     | GCGCG[GC]G          | Nature. 2013 Jul 11;499(7457):172-7 |
| YBX1     | AACATC[AGT]         | Nature. 2013 Jul 11;499(7457):172-7 |
| HuR      | TTT[AG][GT]TT       | Nature. 2013 Jul 11;499(7457):172-7 |
| HuR      | TT[GT][AG]TTT       | Nature. 2013 Jul 11;499(7457):172-7 |
| ENOX1    | [ACT][AG][GT]ACAG   | Nature. 2013 Jul 11;499(7457):172-7 |
| ESRP2    | TGGG[AG]A[AGT]      | Nature. 2013 Jul 11;499(7457):172-7 |
| RBM42    | AACTA[AC]G          | Nature. 2013 Jul 11;499(7457):172-7 |
| RBMS1    | [GT]ATATA[GC]       | Nature. 2013 Jul 11;499(7457):172-7 |
| PABPC3   | [AG]AAAAC[AC]       | Nature. 2013 Jul 11;499(7457):172-7 |
| RBM5     | [GC]AAGG[AG]G       | Nature. 2013 Jul 11;499(7457):172-7 |
| PABPC1   | A[AG]AAAA[AC]       | Nature. 2013 Jul 11;499(7457):172-7 |
| CNOT4    | GACAGA              | Nature. 2013 Jul 11;499(7457):172-7 |
| PABPN1   | A[AG]AAGA           | Nature. 2013 Jul 11;499(7457):172-7 |
| CPEB4    | TTTTTT              | Nature. 2013 Jul 11;499(7457):172-7 |
| RALY     | TTTTTT[CGT]         | Nature. 2013 Jul 11;499(7457):172-7 |
| HNRNPH2  | GGGAGGG             | Nature. 2013 Jul 11;499(7457):172-7 |
| FXR1     | A[CT]GAC[AG]        | Nature. 2013 Jul 11;499(7457):172-7 |
| LIN28A   | [CT]GGAGG[AG]       | Nature. 2013 Jul 11;499(7457):172-7 |
| SRSF1    | GG[AG]GGA[ACG]      | Nature. 2013 Jul 11;499(7457):172-7 |
| ZNF638   | [CGT]GTT[GC][GT]T   | Nature. 2013 Jul 11;499(7457):172-7 |
| TIA1     | [AT]TTTTT[CGT]      | Nature. 2013 Jul 11;499(7457):172-7 |
| BRUNOL5  | TGTGT[GT][GT]       | Nature. 2013 Jul 11;499(7457):172-7 |
| HNRNPCL1 | [ACT]TTTTT[GT]      | Nature. 2013 Jul 11;499(7457):172-7 |
| RBFox1   | [AT]GCATG[AC]       | Nature. 2013 Jul 11;499(7457):172-7 |
| KHDRBS1  | ATAAAA[ACG]         | Nature. 2013 Jul 11;499(7457):172-7 |
| RBM6     | [ACT]ATCCA[AG]      | Nature. 2013 Jul 11;499(7457):172-7 |
| PABPC5   | AGAAA[AGT]T         | Nature. 2013 Jul 11;499(7457):172-7 |
| IGF2BP3  | A[AC]A[ACT][AT]CA   | Nature. 2013 Jul 11;499(7457):172-7 |
| RBMS3    | [ACT]ATATA          | Nature. 2013 Jul 11;499(7457):172-7 |
| MSI1     | TAG[GT][AT][AG]G    | Nature. 2013 Jul 11;499(7457):172-7 |

|           |                        |                                       |
|-----------|------------------------|---------------------------------------|
| SFPQ      | [GT]T[AG][AG]T[GT][GT] | Nature. 2013 Jul 11;499(7457):172-7   |
| HNRPLL    | [AG]CA[ACT]ACA         | Nature. 2013 Jul 11;499(7457):172-7   |
| RBM24     | [AT]G[AT]GTG[AGT]      | Nature. 2013 Jul 11;499(7457):172-7   |
| KHDRBS2   | [AG]ATAAAA[AC]         | Nature. 2013 Jul 11;499(7457):172-7   |
| PCBP1     | CC[AT][AT][ACT]CC      | Nature. 2013 Jul 11;499(7457):172-7   |
| BRUNOL6   | TGTG[AGT][GT]G         | Nature. 2013 Jul 11;499(7457):172-7   |
| RBM45     | GACGA[AC][ACG]         | Nature. 2013 Jul 11;499(7457):172-7   |
| PTBP1     | [ACT][CT]TTT[CT]T      | Nature. 2013 Jul 11;499(7457):172-7   |
| PTBP1     | [ACT][CT]TTT[CT]T      | Nature. 2013 Jul 11;499(7457):172-7   |
| HuR       | TTTTTT[GT]             | Nature. 2013 Jul 11;499(7457):172-7   |
| ESRP1     | TGGTGG                 | Mol Cell Biol. 2012 Apr;32(8):1468-82 |
| NOVA1     | [CT]CA[CT]             | Nature. 2006 Nov 30;444(7119):580-6   |
| SRp20     | [AT]C[AT][AT]C         | RNA. 2012 May;18(5):1041-9            |
| SRp20     | CTC[GT]TC[CT]          | RNA. 2012 May;18(5):1041-9            |
| SF2/ASF   | [AG]GAAGAAC            | RNA. 2012 May;18(5):1041-9            |
| SRp40     | [CT][AG]C[AG][GT][AC]  | RNA. 2012 May;18(5):1041-9            |
| SRp55     | [CT][CT][AT]C[AT][GC]G | RNA. 2012 May;18(5):1041-9            |
| 9G8       | [AT]GGAC[AG]A          | RNA. 2012 May;18(5):1041-9            |
| PTB       | CTCT[CT][CT]           | RNA. 2012 May;18(5):1041-9            |
| Tra2-beta | GAAAGAA                | RNA. 2012 May;18(5):1041-9            |
