# Supplementary material
Source: PubMed Central journal article supplement (PMC4336826)
Supplement: NIHMS633389-supplement-5.pdf [file NIHMS633389-supplement-5.pdf]

Table S4: Differentially spliced genes in enriched GO terms

| 17 Genes in BP---"transmembrane receptor protein tyrosine kinase signaling pathway" |                                                      |
|-------------------------------------------------------------------------------------|------------------------------------------------------|
| ENSEMBL GENE ID                                                                     | GENE NAME                                            |
| ENSG00000089159                                                                     | paxillin                                             |
| ENSG00000095637                                                                     | sorbin and SH3 domain containing 1                   |
| ENSG00000103197                                                                     | tuberous sclerosis 2                                 |
| ENSG00000107263                                                                     | Rap guanine nucleotide exchange factor (GEF) 1       |
| ENSG00000112715                                                                     | vascular endothelial growth factor A                 |
| ENSG00000112851                                                                     | erbb2 interacting protein                            |
| ENSG00000112964                                                                     | growth hormone receptor                              |
| ENSG00000136754                                                                     | abl-interactor 1                                     |
| ENSG00000142208                                                                     | v-akt murine thymoma viral oncogene homolog 1        |
| ENSG00000168374                                                                     | ADP-ribosylation factor 4                            |
| ENSG00000169398                                                                     | PTK2 protein tyrosine kinase 2                       |
| ENSG00000171105                                                                     | insulin receptor                                     |
| ENSG00000174111                                                                     | suppressor of cytokine signaling 7                   |
| ENSG00000175866                                                                     | BAI1-associated protein 2                            |
| ENSG00000196924                                                                     | filamin A, alpha (actin binding protein 280)         |
| ENSG00000197461                                                                     | platelet-derived growth factor alpha polypeptide     |
| ENSG00000197965                                                                     | myelin protein zero-like 1                           |
|                                                                                     |                                                      |
| 39 genes in MF ---"cytoskeletal protein binding"                                    |                                                      |
| ENSEMBL GENE ID                                                                     | GENE NAME                                            |
| ENSG00000175866                                                                     | BAI1-associated protein 2                            |
| ENSG00000112186                                                                     | CAP, adenylate cyclase-associated protein, 2 (yeast) |
| ENSG00000130779                                                                     | CAP-GLY domain containing linker protein 1           |
| ENSG00000136153                                                                     | LIM domain 7                                         |
| ENSG00000136754                                                                     | abl-interactor 1                                     |
| ENSG00000173210                                                                     | actin binding LIM protein family, member 3           |
| ENSG00000011426                                                                     | anillin, actin binding protein                       |
| ENSG00000074054                                                                     | cytoplasmic linker associated protein 1              |
| ENSG00000213918                                                                     | deoxyribonuclease I                                  |
| ENSG00000079805                                                                     | dynamain 2                                           |
| ENSG00000151914                                                                     | dystonin                                             |
| ENSG00000154380                                                                     | enabled homolog (Drosophila)                         |
| ENSG00000088367                                                                     | erythrocyte membrane protein band 4.1-like 1         |
| ENSG00000079819                                                                     | erythrocyte membrane protein band 4.1-like 2         |
| ENSG00000196924                                                                     | filamin A, alpha (actin binding protein 280)         |
| ENSG00000136068                                                                     | filamin B, beta (actin binding protein 278)          |
| ENSG00000157827                                                                     | formin-like 2                                        |
| ENSG00000161791                                                                     | formin-like 3                                        |
| ENSG00000203485                                                                     | inverted formin, FH2 and WH2 domain containing       |
| ENSG00000115648                                                                     | melanophilin                                         |
| ENSG00000132613                                                                     | metastasis suppressor 1-like                         |
| ENSG00000127603                                                                     | microtubule-actin crosslinking factor 1              |
| ENSG00000128641                                                                     | myosin IB                                            |
| ENSG00000066933                                                                     | myosin IXA                                           |

| ENSG00000197535                            | myosin VA (heavy chain 12, myoxin)                                                                                                                     |
|--------------------------------------------|--------------------------------------------------------------------------------------------------------------------------------------------------------|
| ENSG00000196586                            | myosin VI                                                                                                                                              |
| ENSG00000186575                            | neurofibromin 2 (merlin)                                                                                                                               |
| ENSG00000137497                            | nuclear mitotic apparatus protein 1                                                                                                                    |
| ENSG00000166579                            | nudE nuclear distribution gene E homolog (A. nidulans)-like 1                                                                                          |
| ENSG00000089159                            | paxillin                                                                                                                                               |
| ENSG00000156113                            | potassium large conductance calcium-activated channel, subfamily M, alpha                                                                              |
| ENSG00000178209                            | similar to Plectin 1 (PLTN) (PCN) (Hemidesmosomal protein 1) (HD1); plectin                                                                            |
| ENSG00000147601                            | similar to telomeric repeat binding factor (NIMA-interacting) 1; telomeric repeat binding factor (NIMA-interacting) 1; telomeric repeat binding factor |
| ENSG00000183963                            | smoothelin                                                                                                                                             |
| ENSG00000095637                            | sorbin and SH3 domain containing 1                                                                                                                     |
| ENSG00000173898                            | spectrin, beta, non-erythrocytic 2                                                                                                                     |
| ENSG00000008294                            | sperm associated antigen 9                                                                                                                             |
| ENSG00000134278                            | spire homolog 1 (Drosophila)                                                                                                                           |
| ENSG00000152818                            | utrophin                                                                                                                                               |
|                                            |                                                                                                                                                        |
| <b>28 genes in MF ---- "actin binding"</b> |                                                                                                                                                        |
| ENSEMBL GENE ID                            | GENE NAME                                                                                                                                              |
| ENSG00000112186                            | CAP, adenylate cyclase-associated protein, 2 (yeast)                                                                                                   |
| ENSG00000136153                            | LIM domain 7                                                                                                                                           |
| ENSG00000173210                            | actin binding LIM protein family, member 3                                                                                                             |
| ENSG00000011426                            | anillin, actin binding protein                                                                                                                         |
| ENSG00000213918                            | deoxyribonuclease I                                                                                                                                    |
| ENSG00000151914                            | dystonin                                                                                                                                               |
| ENSG00000154380                            | enabled homolog (Drosophila)                                                                                                                           |
| ENSG00000088367                            | erythrocyte membrane protein band 4.1-like 1                                                                                                           |
| ENSG00000079819                            | erythrocyte membrane protein band 4.1-like 2                                                                                                           |
| ENSG00000196924                            | filamin A, alpha (actin binding protein 280)                                                                                                           |
| ENSG00000136068                            | filamin B, beta (actin binding protein 278)                                                                                                            |
| ENSG00000157827                            | formin-like 2                                                                                                                                          |
| ENSG00000161791                            | formin-like 3                                                                                                                                          |
| ENSG00000203485                            | inverted formin, FH2 and WH2 domain containing                                                                                                         |
| ENSG00000115648                            | melanophilin                                                                                                                                           |
| ENSG00000132613                            | metastasis suppressor 1-like                                                                                                                           |
| ENSG00000127603                            | microtubule-actin crosslinking factor 1                                                                                                                |
| ENSG00000128641                            | myosin IB                                                                                                                                              |
| ENSG00000066933                            | myosin IXA                                                                                                                                             |
| ENSG00000197535                            | myosin VA (heavy chain 12, myoxin)                                                                                                                     |
| ENSG00000196586                            | myosin VI                                                                                                                                              |
| ENSG00000156113                            | potassium large conductance calcium-activated channel, subfamily M, alpha member 1                                                                     |
| ENSG00000178209                            | similar to Plectin 1 (PLTN) (PCN) (Hemidesmosomal protein 1) (HD1); plectin 1, intermediate filament binding protein 500kDa                            |
| ENSG00000183963                            | smoothelin                                                                                                                                             |
| ENSG00000095637                            | sorbin and SH3 domain containing 1                                                                                                                     |
| ENSG00000173898                            | spectrin, beta, non-erythrocytic 2                                                                                                                     |

|                                                        |                                                         |
|--------------------------------------------------------|---------------------------------------------------------|
| ENSG00000134278                                        | spire homolog 1 (Drosophila)                            |
| ENSG00000152818                                        | utrophin                                                |
|                                                        |                                                         |
| <b>12 genes in MF ---- "GTPase binding"</b>            |                                                         |
| <b>ENSEMBL GENE ID</b>                                 | <b>GENE NAME</b>                                        |
| ENSG00000184014                                        | DENN/MADD domain containing 5A                          |
| ENSG00000082805                                        | ELKS/RAB6-interacting/CAST family member 1              |
| ENSG00000136717                                        | bridging integrator 1                                   |
| ENSG00000130158                                        | dedicator of cytokinesis 6                              |
| ENSG00000114346                                        | epithelial cell transforming sequence 2 oncogene        |
| ENSG00000196924                                        | filamin A, alpha (actin binding protein 280)            |
| ENSG00000157827                                        | formin-like 2                                           |
| ENSG00000161791                                        | formin-like 3                                           |
| ENSG00000203485                                        | inverted formin, FH2 and WH2 domain containing          |
| ENSG00000115648                                        | melanophilin                                            |
| ENSG00000114993                                        | rhotekin                                                |
| ENSG00000137501                                        | synaptotagmin-like 2                                    |
|                                                        |                                                         |
| <b>24 genes in MF ---- "GTPase regulator activity"</b> |                                                         |
| <b>ENSEMBL GENE ID</b>                                 | <b>GENE NAME</b>                                        |
| ENSG00000101199                                        | ADP-ribosylation factor GTPase activating protein 1     |
| ENSG00000184014                                        | DENN/MADD domain containing 5A                          |
| ENSG00000035499                                        | DEP domain containing 1B                                |
| ENSG00000082805                                        | ELKS/RAB6-interacting/CAST family member 1              |
| ENSG00000174373                                        | GTPase activating Rap/RanGAP domain-like 1              |
| ENSG00000144711                                        | IQ motif and Sec7 domain 1                              |
| ENSG00000110514                                        | MAP-kinase activating death domain                      |
| ENSG00000152061                                        | RAB GTPase activating protein 1-like                    |
| ENSG00000116191                                        | Ral GEF with PH domain and SH3 binding motif 2          |
| ENSG00000107263                                        | Rap guanine nucleotide exchange factor (GEF) 1          |
| ENSG00000140750                                        | Rho GTPase activating protein 17                        |
| ENSG00000132694                                        | Rho guanine nucleotide exchange factor (GEF) 11         |
| ENSG00000196914                                        | Rho guanine nucleotide exchange factor (GEF) 12         |
| ENSG00000107021                                        | TBC1 domain family, member 13                           |
| ENSG00000036054                                        | TBC1 domain family, member 23                           |
| ENSG00000154310                                        | TRAF2 and NCK interacting kinase                        |
| ENSG00000130158                                        | dedicator of cytokinesis 6                              |
| ENSG00000114346                                        | epithelial cell transforming sequence 2 oncogene        |
| ENSG00000115648                                        | melanophilin                                            |
| ENSG00000071054                                        | mitogen-activated protein kinase kinase kinase kinase 4 |
| ENSG00000066933                                        | myosin IXA                                              |
| ENSG00000114993                                        | rhotekin                                                |
| ENSG00000137501                                        | synaptotagmin-like 2                                    |
| ENSG00000103197                                        | tuberous sclerosis 2                                    |
|                                                        |                                                         |
| <b>13 genes in CC ---- " cell leading edge"</b>        |                                                         |
| <b>ENSEMBL GENE ID</b>                                 | <b>GENE NAME</b>                                        |

| ENSG00000175866                          | BAI1-associated protein 2                                     |
|------------------------------------------|---------------------------------------------------------------|
| ENSG00000169398                          | PTK2 protein tyrosine kinase 2                                |
| ENSG00000136754                          | abl-interactor 1                                              |
| ENSG00000198561                          | catenin (cadherin-associated protein), delta 1                |
| ENSG00000154380                          | enabled homolog (Drosophila)                                  |
| ENSG00000197535                          | myosin VA (heavy chain 12, myoxin)                            |
| ENSG00000196586                          | myosin VI                                                     |
| ENSG00000186575                          | neurofibromin 2 (merlin)                                      |
| ENSG00000166579                          | nudE nuclear distribution gene E homolog (A. nidulans)-like 1 |
| ENSG00000089159                          | paxillin                                                      |
| ENSG00000075651                          | phospholipase D1, phosphatidylcholine-specific                |
| ENSG00000180900                          | scribbled homolog (Drosophila)                                |
| ENSG00000142208                          | v-akt murine thymoma viral oncogene homolog 1                 |
|                                          |                                                               |
| <b>52 genes in CC --- "cytoskeleton"</b> |                                                               |
| ENSEMBL GENE ID                          | GENE NAME                                                     |
| ENSG00000127914                          | A kinase (PRKA) anchor protein (yotiao) 9                     |
| ENSG00000168397                          | ATG4 autophagy related 4 homolog B (S. cerevisiae)            |
| ENSG00000130779                          | CAP-GLY domain containing linker protein 1                    |
| ENSG00000049130                          | KIT ligand                                                    |
| ENSG00000169398                          | PTK2 protein tyrosine kinase 2                                |
| ENSG00000107957                          | SH3 and PX domains 2A                                         |
| ENSG00000136754                          | abl-interactor 1                                              |
| ENSG00000011426                          | anillin, actin binding protein                                |
| ENSG00000122359                          | annexin A11                                                   |
| ENSG00000136717                          | bridging integrator 1                                         |
| ENSG00000138778                          | centromere protein E, 312kDa                                  |
| ENSG00000074054                          | cytoplasmic linker associated protein 1                       |
| ENSG00000106976                          | dynamamin 1                                                   |
| ENSG00000079805                          | dynamamin 2                                                   |
| ENSG00000151914                          | dystonin                                                      |
| ENSG00000154380                          | enabled homolog (Drosophila)                                  |
| ENSG00000088367                          | erythrocyte membrane protein band 4.1-like 1                  |
| ENSG00000079819                          | erythrocyte membrane protein band 4.1-like 2                  |
| ENSG00000182473                          | exocyst complex component 7                                   |
| ENSG00000196924                          | filamin A, alpha (actin binding protein 280)                  |
| ENSG00000136068                          | filamin B, beta (actin binding protein 278)                   |
| ENSG00000187239                          | formin binding protein 1                                      |
| ENSG00000149503                          | inner centromere protein antigens 135/155kDa                  |
| ENSG00000137177                          | kinesin family member 13A                                     |
| ENSG00000126214                          | kinesin light chain 1                                         |
| ENSG00000115648                          | melanophilin                                                  |
| ENSG00000127603                          | microtubule-actin crosslinking factor 1                       |
| ENSG00000138119                          | myoferlin                                                     |
| ENSG00000128641                          | myosin IB                                                     |
| ENSG00000066933                          | myosin IXA                                                    |
| ENSG00000197535                          | myosin VA (heavy chain 12, myoxin)                            |

|                 |                                                                                                                                                        |
|-----------------|--------------------------------------------------------------------------------------------------------------------------------------------------------|
| ENSG00000196586 | myosin VI                                                                                                                                              |
| ENSG00000196535 | myosin XVIII A                                                                                                                                         |
| ENSG00000186575 | neurofibromin 2 (merlin)                                                                                                                               |
| ENSG00000137497 | nuclear mitotic apparatus protein 1                                                                                                                    |
| ENSG00000095906 | nucleotide binding protein 2 (MinD homolog, E. coli)                                                                                                   |
| ENSG00000166579 | nudE nuclear distribution gene E homolog (A. nidulans)-like 1                                                                                          |
| ENSG00000089159 | paxillin                                                                                                                                               |
| ENSG00000123349 | prefoldin subunit 5                                                                                                                                    |
| ENSG00000198901 | protein regulator of cytokinesis 1                                                                                                                     |
| ENSG00000163681 | sarcolemma associated protein                                                                                                                          |
| ENSG00000178209 | similar to Plectin 1 (PLTN) (PCN) (Hemidesmosomal protein 1) (HD1); plectin                                                                            |
| ENSG00000147601 | similar to telomeric repeat binding factor (NIMA-interacting) 1; telomeric repeat binding factor (NIMA-interacting) 1; telomeric repeat binding factor |
| ENSG00000183963 | smoothelin                                                                                                                                             |
| ENSG00000095637 | sorbin and SH3 domain containing 1                                                                                                                     |
| ENSG00000173898 | spectrin, beta, non-erythrocytic 2                                                                                                                     |
| ENSG00000134278 | spire homolog 1 (Drosophila)                                                                                                                           |
| ENSG00000040341 | staufen, RNA binding protein, homolog 2 (Drosophila)                                                                                                   |
| ENSG00000103197 | tuberous sclerosis 2                                                                                                                                   |
| ENSG00000105397 | tyrosine kinase 2                                                                                                                                      |
| ENSG00000152818 | utrophin                                                                                                                                               |
| ENSG00000142208 | v-akt murine thymoma viral oncogene homolog 1                                                                                                          |
|                 |                                                                                                                                                        |

**86 genes in CC ---- "plasma membrane"**

| ENSEMBL GENE ID | GENE NAME                                                                                |
|-----------------|------------------------------------------------------------------------------------------|
| ENSG00000168374 | ADP-ribosylation factor 4                                                                |
| ENSG00000175866 | BAI1-associated protein 2                                                                |
| ENSG00000112186 | CAP, adenylate cyclase-associated protein, 2 (yeast)                                     |
| ENSG00000026508 | CD44 molecule (Indian blood group)                                                       |
| ENSG00000117335 | CD46 molecule, complement regulatory protein                                             |
| ENSG00000196776 | CD47 molecule                                                                            |
| ENSG00000102181 | CD99 molecule-like 2                                                                     |
| ENSG00000083857 | FAT tumor suppressor homolog 1 (Drosophila)                                              |
| ENSG00000205336 | G protein-coupled receptor 56                                                            |
| ENSG00000049130 | KIT ligand                                                                               |
| ENSG00000136153 | LIM domain 7                                                                             |
| ENSG00000110514 | MAP-kinase activating death domain                                                       |
| ENSG00000169398 | PTK2 protein tyrosine kinase 2                                                           |
| ENSG00000116191 | Ral GEF with PH domain and SH3 binding motif 2                                           |
| ENSG00000140750 | Rho GTPase activating protein 17                                                         |
| ENSG00000132694 | Rho guanine nucleotide exchange factor (GEF) 11                                          |
| ENSG00000138674 | SEC31 homolog A (S. cerevisiae)                                                          |
| ENSG00000065613 | STE20-like kinase (yeast)                                                                |
| ENSG00000110719 | T-cell, immune regulator 1, ATPase, H <sup>+</sup> transporting, lysosomal V0 subunit A3 |
| ENSG00000136754 | abl-interactor 1                                                                         |
| ENSG00000100280 | adaptor-related protein complex 1, beta 1 subunit                                        |

|                 |                                                                                             |
|-----------------|---------------------------------------------------------------------------------------------|
| ENSG00000213983 | adaptor-related protein complex 1, gamma 2 subunit                                          |
| ENSG00000174233 | adenylate cyclase 6                                                                         |
| ENSG00000121281 | adenylate cyclase 7                                                                         |
| ENSG00000084234 | amyloid beta (A4) precursor-like protein 2                                                  |
| ENSG00000197043 | annexin A6                                                                                  |
| ENSG00000131620 | anoctamin 1, calcium activated chloride channel                                             |
| ENSG00000130433 | calcium channel, voltage-dependent, gamma subunit 6                                         |
| ENSG00000171603 | calsyntenin 1                                                                               |
| ENSG00000074410 | carbonic anhydrase XII                                                                      |
| ENSG00000198561 | catenin (cadherin-associated protein), delta 1                                              |
| ENSG00000184371 | colony stimulating factor 1 (macrophage)                                                    |
| ENSG00000079805 | dynamain 2                                                                                  |
| ENSG00000151914 | dystonin                                                                                    |
| ENSG00000154380 | enabled homolog (Drosophila)                                                                |
| ENSG00000063245 | epsin 1                                                                                     |
| ENSG00000112851 | erbb2 interacting protein                                                                   |
| ENSG00000088367 | erythrocyte membrane protein band 4.1-like 1                                                |
| ENSG00000079819 | erythrocyte membrane protein band 4.1-like 2                                                |
| ENSG00000182473 | exocyst complex component 7                                                                 |
| ENSG00000117868 | family with sequence similarity 62 (C2 domain containing), member B                         |
| ENSG00000115414 | fibronectin 1                                                                               |
| ENSG00000196924 | filamin A, alpha (actin binding protein 280)                                                |
| ENSG00000187239 | formin binding protein 1                                                                    |
| ENSG00000112964 | growth hormone receptor                                                                     |
| ENSG00000171105 | insulin receptor                                                                            |
| ENSG00000091409 | integrin, alpha 6                                                                           |
| ENSG00000135424 | integrin, alpha 7                                                                           |
| ENSG00000132470 | integrin, beta 4                                                                            |
| ENSG00000157193 | low density lipoprotein receptor-related protein 8, apolipoprotein e receptor               |
| ENSG00000064547 | lysophosphatidic acid receptor 2                                                            |
| ENSG00000076706 | melanoma cell adhesion molecule                                                             |
| ENSG00000151276 | membrane associated guanylate kinase, WW and PDZ domain containing 1; CNKSR family member 3 |
| ENSG00000081026 | membrane associated guanylate kinase, WW and PDZ domain containing 3                        |
| ENSG00000127603 | microtubule-actin crosslinking factor 1                                                     |
| ENSG00000197965 | myelin protein zero-like 1                                                                  |
| ENSG00000138119 | myoferlin                                                                                   |
| ENSG00000196586 | myosin VI                                                                                   |
| ENSG00000186575 | neurofibromin 2 (merlin)                                                                    |
| ENSG00000133961 | numb homolog (Drosophila)                                                                   |
| ENSG00000089159 | paxillin                                                                                    |
| ENSG00000075651 | phospholipase D1, phosphatidylcholine-specific                                              |
| ENSG00000044446 | phosphorylase kinase, alpha 2 (liver)                                                       |
| ENSG00000008710 | polycystic kidney disease 1 (autosomal dominant)                                            |

|                                         |                                                                                                                                  |
|-----------------------------------------|----------------------------------------------------------------------------------------------------------------------------------|
| ENSG00000156113                         | potassium large conductance calcium-activated channel, subfamily M, alpha member 1                                               |
| ENSG00000116396                         | potassium voltage-gated channel, Shaw-related subfamily, member 4                                                                |
| ENSG00000142949                         | protein tyrosine phosphatase, receptor type, F                                                                                   |
| ENSG00000105426                         | protein tyrosine phosphatase, receptor type, S                                                                                   |
| ENSG00000112531                         | quaking homolog, KH domain RNA binding (mouse)                                                                                   |
| ENSG00000163681                         | sarcolemma associated protein                                                                                                    |
| ENSG00000180900                         | scribbled homolog (Drosophila)                                                                                                   |
| ENSG00000130396                         | similar to Afadin (Protein AF-6); myeloid/lymphoid or mixed-lineage leukemia (trithorax homolog, Drosophila); translocated to, 4 |
| ENSG00000178209                         | similar to Plectin 1 (PLTN) (PCN) (Hemidesmosomal protein 1) (HD1); plectin 1, intermediate filament binding protein 500kDa      |
| ENSG00000197375                         | solute carrier family 22 (organic cation/carnitine transporter), member 5                                                        |
| ENSG00000102078                         | solute carrier family 25 (mitochondrial carrier, brain), member 14                                                               |
| ENSG00000174669                         | solute carrier family 29 (nucleoside transporters), member 2                                                                     |
| ENSG00000095637                         | sorbin and SH3 domain containing 1                                                                                               |
| ENSG00000174111                         | suppressor of cytokine signaling 7                                                                                               |
| ENSG00000011347                         | synaptotagmin XVII; synaptotagmin VII                                                                                            |
| ENSG00000137501                         | synaptotagmin-like 2                                                                                                             |
| ENSG00000214063                         | tetraspanin 4                                                                                                                    |
| ENSG00000103197                         | tuberous sclerosis 2                                                                                                             |
| ENSG00000152818                         | utrophin                                                                                                                         |
| ENSG00000133703                         | v-Ki-ras2 Kirsten rat sarcoma viral oncogene homolog                                                                             |
| ENSG00000142208                         | v-akt murine thymoma viral oncogene homolog 1                                                                                    |
| ENSG00000197415                         | ventricular zone expressed PH domain homolog 1 (zebrafish)                                                                       |
|                                         |                                                                                                                                  |
| <b>12 genes in CC --- "cell cortex"</b> |                                                                                                                                  |
| <b>ENSEMBL GENE ID</b>                  | <b>GENE NAME</b>                                                                                                                 |
| ENSG00000011426                         | anillin, actin binding protein                                                                                                   |
| ENSG00000074054                         | cytoplasmic linker associated protein 1                                                                                          |
| ENSG00000079819                         | erythrocyte membrane protein band 4.1-like 2                                                                                     |
| ENSG00000090989                         | exocyst complex component 1                                                                                                      |
| ENSG00000182473                         | exocyst complex component 7                                                                                                      |
| ENSG00000196924                         | filamin A, alpha (actin binding protein 280)                                                                                     |
| ENSG00000136068                         | filamin B, beta (actin binding protein 278)                                                                                      |
| ENSG00000187239                         | formin binding protein 1                                                                                                         |
| ENSG00000127603                         | microtubule-actin crosslinking factor 1                                                                                          |
| ENSG00000196586                         | myosin VI                                                                                                                        |
| ENSG00000173898                         | spectrin, beta, non-erythrocytic 2                                                                                               |
| ENSG00000152818                         | utrophin                                                                                                                         |
