# Supplementary material
Source: PubMed Central journal article supplement (PMC4336826)
Supplement: NIHMS633389-supplement-6.pdf [file NIHMS633389-supplement-6.pdf]

**Table S5: Enriched GO in differentially expressed genes**  
all expressed genes (13,984)

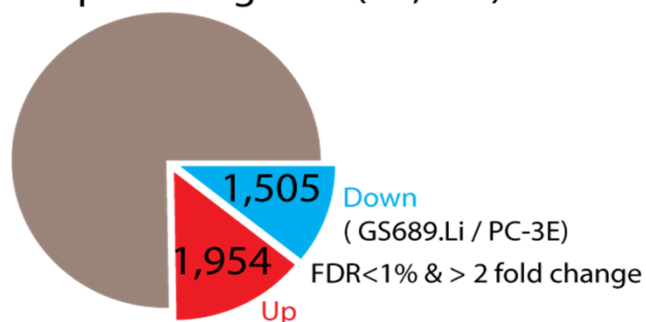

**Downregulated gene list 1505 vs. all 13984 genes**

| Category      | Term                                                 | Count | %    | P-Value    | Benjamini-Hochberg FDR |
|---------------|------------------------------------------------------|-------|------|------------|------------------------|
| GOTERM_BP_FAT | epidermis development                                | 29    | 2.2  | 0.00000056 | 0.00094                |
| GOTERM_BP_FAT | ectoderm development                                 | 31    | 2.3  | 0.00000048 | 0.0016                 |
| GOTERM_BP_FAT | response to wounding                                 | 54    | 4.1  | 0.00000049 | 0.0054                 |
| GOTERM_BP_FAT | defense response                                     | 47    | 3.5  | 0.000011   | 0.0094                 |
| GOTERM_BP_FAT | immune response                                      | 55    | 4.1  | 0.00002    | 0.013                  |
| GOTERM_BP_FAT | inflammatory response                                | 32    | 2.4  | 0.000024   | 0.013                  |
| GOTERM_BP_FAT | epithelium development                               | 32    | 2.4  | 0.000028   | 0.013                  |
| GOTERM_BP_FAT | embryonic organ development                          | 25    | 1.9  | 0.000051   | 0.019                  |
| GOTERM_BP_FAT | leukocyte chemotaxis                                 | 10    | 0.8  | 0.000046   | 0.019                  |
| GOTERM_BP_FAT | cell chemotaxis                                      | 10    | 0.8  | 0.000079   | 0.026                  |
| GOTERM_BP_FAT | response to steroid hormone stimulus                 | 28    | 2.1  | 0.000089   | 0.027                  |
| GOTERM_BP_FAT | positive regulation of response to external stimulus | 13    | 1    | 0.00017    | 0.046                  |
| GOTERM_CC_FAT | extracellular region                                 | 140   | 10.6 | 1.9E-10    | 0.000000091            |
| GOTERM_CC_FAT | plasma membrane                                      | 271   | 20.4 | 0.00000007 | 0.000016               |
| GOTERM_CC_FAT | extracellular region part                            | 78    | 5.9  | 0.00000068 | 0.000081               |
| GOTERM_CC_FAT | plasma membrane part                                 | 188   | 14.2 | 0.00000057 | 0.00009                |
| GOTERM_CC_FAT | extracellular space                                  | 56    | 4.2  | 0.0000038  | 0.00036                |
| GOTERM_CC_FAT | apical junction complex                              | 22    | 1.7  | 0.000054   | 0.0042                 |
| GOTERM_CC_FAT | intrinsic to plasma membrane                         | 92    | 6.9  | 0.000086   | 0.0051                 |
| GOTERM_CC_FAT | apicolateral plasma membrane                         | 22    | 1.7  | 0.000083   | 0.0056                 |
| GOTERM_CC_FAT | cell-cell junction                                   | 32    | 2.4  | 0.00013    | 0.0061                 |
| GOTERM_CC_FAT | integral to plasma membrane                          | 89    | 6.7  | 0.00013    | 0.0067                 |
| GOTERM_CC_FAT | integral to membrane                                 | 351   | 26.5 | 0.00044    | 0.019                  |
| GOTERM_CC_FAT | intrinsic to membrane                                | 361   | 27.2 | 0.00079    | 0.031                  |

## Upregulated gene list 1954 vs. all 13984 genes

| Category      | Term                                                             | Count | %   | P-Value     | Benjamini-Hochberg FDR |
|---------------|------------------------------------------------------------------|-------|-----|-------------|------------------------|
| GOTERM_BP_FAT | biological adhesion                                              | 99    | 6.4 | 6.3E-16     | 1.1E-12                |
| GOTERM_BP_FAT | cell adhesion                                                    | 99    | 6.4 | 5.6E-16     | 1.9E-12                |
| GOTERM_BP_FAT | cell surface receptor linked signal transduction                 | 151   | 9.8 | 1.1E-12     | 1.3E-09                |
| GOTERM_BP_FAT | G-protein coupled receptor protein signaling pathway             | 64    | 4.2 | 1.3E-10     | 0.000000089            |
| GOTERM_BP_FAT | response to wounding                                             | 70    | 4.5 | 1.3E-10     | 0.00000011             |
| GOTERM_BP_FAT | cell-cell signaling                                              | 66    | 4.3 | 2.3E-09     | 0.0000013              |
| GOTERM_BP_FAT | regulation of adenylate cyclase activity                         | 17    | 1.1 | 0.000000066 | 0.000032               |
| GOTERM_BP_FAT | regulation of cyclase activity                                   | 17    | 1.1 | 0.00000012  | 0.000051               |
| GOTERM_BP_FAT | regulation of cyclic nucleotide biosynthetic process             | 18    | 1.2 | 0.00000015  | 0.000058               |
| GOTERM_BP_FAT | regulation of nucleotide biosynthetic process                    | 18    | 1.2 | 0.00000015  | 0.000058               |
| GOTERM_BP_FAT | regulation of cAMP biosynthetic process                          | 17    | 1.1 | 0.00000022  | 0.000073               |
| GOTERM_BP_FAT | regulation of lyase activity                                     | 17    | 1.1 | 0.00000022  | 0.000073               |
| GOTERM_BP_FAT | G-protein signaling, coupled to cAMP nucleotide second messenger | 16    | 1   | 0.00000029  | 0.00009                |
| GOTERM_BP_FAT | neurological system process                                      | 79    | 5.1 | 0.00000038  | 0.000092               |
| GOTERM_BP_FAT | regulation of cell proliferation                                 | 102   | 6.6 | 0.00000046  | 0.000092               |
| GOTERM_BP_FAT | regulation of cell migration                                     | 36    | 2.3 | 0.00000044  | 0.000092               |
| GOTERM_BP_FAT | regulation of cyclic nucleotide metabolic process                | 18    | 1.2 | 0.00000042  | 0.000095               |
| GOTERM_BP_FAT | regulation of cell motion                                        | 40    | 2.6 | 0.00000038  | 0.000099               |
| GOTERM_BP_FAT | wound healing                                                    | 35    | 2.3 | 0.00000035  | 0.000099               |
| GOTERM_BP_FAT | cell-cell adhesion                                               | 36    | 2.3 | 0.00000068  | 0.00011                |
| GOTERM_BP_FAT | regulation of cAMP metabolic process                             | 17    | 1.1 | 0.00000062  | 0.00012                |
| GOTERM_BP_FAT | regulation of locomotion                                         | 37    | 2.4 | 0.00000066  | 0.00012                |
| GOTERM_BP_FAT | regulation of nucleotide metabolic process                       | 18    | 1.2 | 0.00000016  | 0.00025                |
| GOTERM_BP_FAT | cAMP-mediated signaling                                          | 17    | 1.1 | 0.00000016  | 0.00026                |
| GOTERM_BP_FAT | homophilic cell adhesion                                         | 19    | 1.2 | 0.00000034  | 0.0005                 |
| GOTERM_BP_FAT | extracellular structure organization                             | 28    | 1.8 | 0.00000047  | 0.00066                |

|               |                                                                    |    |     |           |         |
|---------------|--------------------------------------------------------------------|----|-----|-----------|---------|
| GOTERM_BP_FAT | positive regulation of cell proliferation                          | 58 | 3.8 | 0.0000055 | 0.00074 |
| GOTERM_BP_FAT | defense response                                                   | 51 | 3.3 | 0.000008  | 0.001   |
| GOTERM_BP_FAT | G-protein signaling, coupled to cyclic nucleotide second messenger | 16 | 1   | 0.0000091 | 0.0011  |
| GOTERM_BP_FAT | cyclic-nucleotide-mediated signaling                               | 18 | 1.2 | 0.000011  | 0.0013  |
| GOTERM_BP_FAT | metal ion homeostasis                                              | 26 | 1.7 | 0.000012  | 0.0014  |
| GOTERM_BP_FAT | response to hormone stimulus                                       | 53 | 3.4 | 0.000015  | 0.0017  |
| GOTERM_BP_FAT | vasculature development                                            | 43 | 2.8 | 0.000018  | 0.0019  |
| GOTERM_BP_FAT | transmission of nerve impulse                                      | 39 | 2.5 | 0.000018  | 0.002   |
| GOTERM_BP_FAT | behavior                                                           | 48 | 3.1 | 0.000023  | 0.0023  |
| GOTERM_BP_FAT | blood vessel development                                           | 42 | 2.7 | 0.000027  | 0.0027  |
| GOTERM_BP_FAT | cellular metal ion homeostasis                                     | 24 | 1.6 | 0.000031  | 0.0029  |
| GOTERM_BP_FAT | regulation of body fluid levels                                    | 22 | 1.4 | 0.000031  | 0.003   |
| GOTERM_BP_FAT | lung development                                                   | 22 | 1.4 | 0.00004   | 0.0036  |
| GOTERM_BP_FAT | morphogenesis of a branching structure                             | 18 | 1.2 | 0.000041  | 0.0036  |
| GOTERM_BP_FAT | hemostasis                                                         | 19 | 1.2 | 0.000045  | 0.0037  |
| GOTERM_BP_FAT | negative regulation of lyase activity                              | 11 | 0.7 | 0.000044  | 0.0038  |
| GOTERM_BP_FAT | negative regulation of adenylate cyclase activity                  | 11 | 0.7 | 0.000044  | 0.0038  |
| GOTERM_BP_FAT | negative regulation of cyclase activity                            | 11 | 0.7 | 0.000044  | 0.0038  |
| GOTERM_BP_FAT | neuron differentiation                                             | 53 | 3.4 | 0.000045  | 0.0038  |
| GOTERM_BP_FAT | immune response                                                    | 58 | 3.8 | 0.00005   | 0.004   |
| GOTERM_BP_FAT | blood coagulation                                                  | 18 | 1.2 | 0.000055  | 0.0041  |
| GOTERM_BP_FAT | coagulation                                                        | 18 | 1.2 | 0.000055  | 0.0041  |
| GOTERM_BP_FAT | cell morphogenesis involved in differentiation                     | 36 | 2.3 | 0.000054  | 0.0041  |
| GOTERM_BP_FAT | response to endogenous stimulus                                    | 55 | 3.6 | 0.000054  | 0.0042  |
| GOTERM_BP_FAT | regulation of cell adhesion                                        | 25 | 1.6 | 0.000058  | 0.0043  |
| GOTERM_BP_FAT | respiratory tube development                                       | 22 | 1.4 | 0.000064  | 0.0045  |
| GOTERM_BP_FAT | blood vessel morphogenesis                                         | 37 | 2.4 | 0.000065  | 0.0046  |
| GOTERM_BP_FAT | second-messenger-mediated signaling                                | 28 | 1.8 | 0.000071  | 0.0049  |
| GOTERM_BP_FAT | tube development                                                   | 36 | 2.3 | 0.000073  | 0.0049  |
| GOTERM_BP_FAT | inflammatory response                                              | 33 | 2.1 | 0.000075  | 0.0049  |

|               |                                                  |     |     |          |        |
|---------------|--------------------------------------------------|-----|-----|----------|--------|
| GOTERM_BP_FAT | positive regulation of cell migration            | 21  | 1.4 | 0.000081 | 0.0052 |
| GOTERM_BP_FAT | response to steroid hormone stimulus             | 30  | 1.9 | 0.000086 | 0.0054 |
| GOTERM_BP_FAT | positive regulation of cell motion               | 22  | 1.4 | 0.0001   | 0.0062 |
| GOTERM_BP_FAT | cell motion                                      | 59  | 3.8 | 0.00011  | 0.0065 |
| GOTERM_BP_FAT | synaptic transmission                            | 31  | 2   | 0.00011  | 0.0066 |
| GOTERM_BP_FAT | response to oxygen levels                        | 27  | 1.8 | 0.00013  | 0.0078 |
| GOTERM_BP_FAT | skeletal system development                      | 43  | 2.8 | 0.00015  | 0.0086 |
| GOTERM_BP_FAT | locomotory behavior                              | 31  | 2   | 0.00015  | 0.0086 |
| GOTERM_BP_FAT | positive regulation of locomotion                | 21  | 1.4 | 0.00016  | 0.0089 |
| GOTERM_BP_FAT | extracellular matrix organization                | 19  | 1.2 | 0.00017  | 0.0091 |
| GOTERM_BP_FAT | response to organic substance                    | 84  | 5.4 | 0.00018  | 0.01   |
| GOTERM_BP_FAT | respiratory system development                   | 22  | 1.4 | 0.00019  | 0.01   |
| GOTERM_BP_FAT | calcium ion homeostasis                          | 22  | 1.4 | 0.00019  | 0.01   |
| GOTERM_BP_FAT | response to estrogen stimulus                    | 21  | 1.4 | 0.0002   | 0.01   |
| GOTERM_BP_FAT | cellular calcium ion homeostasis                 | 21  | 1.4 | 0.00025  | 0.013  |
| GOTERM_BP_FAT | intracellular signaling cascade                  | 142 | 9.2 | 0.00026  | 0.013  |
| GOTERM_BP_FAT | response to virus                                | 19  | 1.2 | 0.00026  | 0.013  |
| GOTERM_BP_FAT | axon guidance                                    | 19  | 1.2 | 0.00026  | 0.013  |
| GOTERM_BP_FAT | response to cytokine stimulus                    | 18  | 1.2 | 0.00034  | 0.017  |
| GOTERM_BP_FAT | enzyme linked receptor protein signaling pathway | 48  | 3.1 | 0.00036  | 0.017  |
| GOTERM_BP_FAT | cell morphogenesis                               | 47  | 3   | 0.00037  | 0.018  |
| GOTERM_BP_FAT | metal ion transport                              | 46  | 3   | 0.00039  | 0.018  |
| GOTERM_BP_FAT | cellular component morphogenesis                 | 51  | 3.3 | 0.00039  | 0.018  |
| GOTERM_BP_FAT | muscle organ development                         | 30  | 1.9 | 0.00041  | 0.019  |
| GOTERM_BP_FAT | neuron projection morphogenesis                  | 30  | 1.9 | 0.00047  | 0.021  |
| GOTERM_BP_FAT | calcium ion transport                            | 20  | 1.3 | 0.00048  | 0.021  |
| GOTERM_BP_FAT | epithelial cell differentiation                  | 20  | 1.3 | 0.00048  | 0.021  |
| GOTERM_BP_FAT | negative regulation of cell proliferation        | 49  | 3.2 | 0.00047  | 0.021  |
| GOTERM_BP_FAT | branching morphogenesis of a tube                | 15  | 1   | 0.00054  | 0.023  |

|               |                                                       |     |      |            |           |
|---------------|-------------------------------------------------------|-----|------|------------|-----------|
| GOTERM_BP_FAT | heart morphogenesis                                   | 16  | 1    | 0.00055    | 0.023     |
| GOTERM_BP_FAT | positive regulation of DNA replication                | 10  | 0.6  | 0.00069    | 0.029     |
| GOTERM_BP_FAT | di-, tri-valent inorganic cation transport            | 24  | 1.6  | 0.00069    | 0.029     |
| GOTERM_BP_FAT | axonogenesis                                          | 27  | 1.8  | 0.00078    | 0.032     |
| GOTERM_BP_FAT | neuron projection development                         | 34  | 2.2  | 0.0008     | 0.032     |
| GOTERM_BP_FAT | cellular cation homeostasis                           | 28  | 1.8  | 0.00079    | 0.032     |
| GOTERM_BP_FAT | neuron development                                    | 41  | 2.7  | 0.00085    | 0.033     |
| GOTERM_BP_FAT | response to estradiol stimulus                        | 13  | 0.8  | 0.0011     | 0.043     |
| GOTERM_BP_FAT | cell morphogenesis involved in neuron differentiation | 28  | 1.8  | 0.0012     | 0.046     |
| GOTERM_BP_FAT | bone development                                      | 21  | 1.4  | 0.0013     | 0.049     |
| GOTERM_BP_FAT | cell projection morphogenesis                         | 33  | 2.1  | 0.0013     | 0.049     |
| GOTERM_CC_FAT | extracellular region                                  | 205 | 13.3 | 2.3E-31    | 1.1E-28   |
| GOTERM_CC_FAT | extracellular region part                             | 124 | 8    | 9E-24      | 2.1E-21   |
| GOTERM_CC_FAT | plasma membrane                                       | 342 | 22.2 | 1.7E-18    | 2.6E-16   |
| GOTERM_CC_FAT | intrinsic to membrane                                 | 467 | 30.3 | 2.7E-15    | 3.1E-13   |
| GOTERM_CC_FAT | extracellular matrix                                  | 61  | 4    | 3.5E-15    | 3.2E-13   |
| GOTERM_CC_FAT | extracellular space                                   | 79  | 5.1  | 8.2E-14    | 6.4E-12   |
| GOTERM_CC_FAT | intrinsic to plasma membrane                          | 131 | 8.5  | 1E-13      | 7E-12     |
| GOTERM_CC_FAT | integral to membrane                                  | 445 | 28.9 | 1.9E-13    | 1.1E-11   |
| GOTERM_CC_FAT | integral to plasma membrane                           | 127 | 8.2  | 2.8E-13    | 1.3E-11   |
| GOTERM_CC_FAT | proteinaceous extracellular matrix                    | 54  | 3.5  | 2.8E-13    | 1.5E-11   |
| GOTERM_CC_FAT | plasma membrane part                                  | 224 | 14.5 | 6.4E-11    | 2.8E-09   |
| GOTERM_CC_FAT | extracellular matrix part                             | 27  | 1.8  | 0.00000028 | 0.0000011 |
| GOTERM_CC_FAT | basement membrane                                     | 19  | 1.2  | 0.000015   | 0.00053   |
| GOTERM_CC_FAT | cell projection                                       | 88  | 5.7  | 0.000019   | 0.00065   |
| GOTERM_CC_FAT | neuron projection                                     | 50  | 3.2  | 0.000037   | 0.0012    |
| GOTERM_CC_FAT | external side of plasma membrane                      | 22  | 1.4  | 0.00058    | 0.017     |
| GOTERM_CC_FAT | synapse part                                          | 29  | 1.9  | 0.00069    | 0.019     |
| GOTERM_CC_FAT | cell surface                                          | 39  | 2.5  | 0.0014     | 0.036     |
| GOTERM_MF_FAT | calcium ion binding                                   | 121 | 7.8  | 8.6E-18    | 9.2E-15   |
| GOTERM_MF_FAT | growth factor binding                                 | 26  | 1.7  | 0.00000022 | 0.00012   |
| GOTERM_MF_FAT | ion channel activity                                  | 36  | 2.3  | 0.000035   | 0.0041    |
| GOTERM_MF_FAT | endopeptidase inhibitor activity                      | 20  | 1.3  | 0.000024   | 0.0042    |
| GOTERM_MF_FAT | channel activity                                      | 38  | 2.5  | 0.000033   | 0.0044    |

|               |                                              |    |     |          |        |
|---------------|----------------------------------------------|----|-----|----------|--------|
| GOTERM_MF_FAT | passive transmembrane transporter activity   | 38 | 2.5 | 0.000033 | 0.0044 |
| GOTERM_MF_FAT | peptidase inhibitor activity                 | 20 | 1.3 | 0.000032 | 0.0048 |
| GOTERM_MF_FAT | gated channel activity                       | 30 | 1.9 | 0.000024 | 0.005  |
| GOTERM_MF_FAT | neurotransmitter binding                     | 11 | 0.7 | 0.000047 | 0.005  |
| GOTERM_MF_FAT | peptide binding                              | 25 | 1.6 | 0.000068 | 0.006  |
| GOTERM_MF_FAT | substrate specific channel activity          | 37 | 2.4 | 0.000023 | 0.0061 |
| GOTERM_MF_FAT | neurotransmitter receptor activity           | 10 | 0.6 | 0.000065 | 0.0063 |
| GOTERM_MF_FAT | peptide receptor activity                    | 12 | 0.8 | 0.00002  | 0.0069 |
| GOTERM_MF_FAT | peptide receptor activity, G-protein coupled | 12 | 0.8 | 0.00002  | 0.0069 |
| GOTERM_MF_FAT | calcium channel activity                     | 13 | 0.8 | 0.000086 | 0.007  |
| GOTERM_MF_FAT | cation channel activity                      | 27 | 1.8 | 0.00022  | 0.016  |
| GOTERM_MF_FAT | glycosaminoglycan binding                    | 19 | 1.2 | 0.00023  | 0.017  |
| GOTERM_MF_FAT | serine-type endopeptidase inhibitor activity | 13 | 0.8 | 0.00037  | 0.024  |
| GOTERM_MF_FAT | integrin binding                             | 13 | 0.8 | 0.00037  | 0.024  |
| GOTERM_MF_FAT | lipid binding                                | 56 | 3.6 | 0.00062  | 0.038  |
| GOTERM_MF_FAT | growth factor activity                       | 21 | 1.4 | 0.00073  | 0.042  |
| GOTERM_MF_FAT | polysaccharide binding                       | 19 | 1.2 | 0.00084  | 0.046  |
| GOTERM_MF_FAT | pattern binding                              | 19 | 1.2 | 0.00084  | 0.046  |
